# Supplementary material for: Self-organization of 1,6-dialkyl-3a,6a-diphenylglycolurils in the crystalline state
Source: Royal Society of Chemistry journal article supplement (doi:10.1039/d1ce00434d), 2021-01-01

## Supporting info for:

# Self-organization of 1,6-dialkyl-3a,6a-diphenylglycolurils in the crystalline state

Valentina A. Karnoukhova,<sup>a</sup> Vladimir V. Baranov,<sup>b</sup> Anna V. Vologzhanina,<sup>a</sup> Angelina N. Kravchenko<sup>b,c</sup> and Ivan V. Fedyanin<sup>a,c\*</sup>

<sup>a</sup>A.N. Nesmeyanov Institute of Organoelement Compounds, Russian Academy of Sciences, Vavilova st. 28, 119991 Moscow, Russian Federation. Fax: +7 495 1355085;

<sup>b</sup>N. D. Zelinsky Institute of Organic Chemistry, Russian Academy of Sciences, 119991 Moscow, Russian Federation, Fax: +7 499 135 5328;

<sup>c</sup>Plekhanov Russian University of Economics, Stremyanny lane 36, Moscow, 117997, Russian Federation.

E-mail: [octy@xrlab.ineos.ac.ru](mailto:octy@xrlab.ineos.ac.ru)

## Table of Contents

|                                                    |     |
|----------------------------------------------------|-----|
| 1. X-ray diffraction data.....                     | S2  |
| 2. Asymmetric unit and crystal packing images..... | S4  |
| 3. CE-B3LYP calculations.....                      | S6  |
| 4. Crystal morphology.....                         | S12 |
| 5. Powder diffraction.....                         | S14 |
| 6. Measurements of hydrophobic properties.....     | S14 |
| 7. Analytical data for 2a and 2b.....              | S15 |
| 8. NMR spectra for samples 1a·MeOH, 1b, 2a,2b..... | S16 |

# 1. X-ray diffraction data

Table TS1 Crystal data and structure refinement for **1a** solid forms.

|                                                                              | <b>1a</b>                                                     | <b>1a·2CH<sub>3</sub>COOH</b>                                 | <b>1a·C<sub>6</sub>H<sub>10</sub>O</b>                        | <b>1a·1.5C<sub>4</sub>H<sub>8</sub>O<sub>2</sub></b>          | <b>1a·CHOOH</b>                                               | <b>1a·C<sub>4</sub>H<sub>8</sub>O<sub>3</sub></b>             | <b>1a·CH<sub>3</sub>OH</b>                                    |
|------------------------------------------------------------------------------|---------------------------------------------------------------|---------------------------------------------------------------|---------------------------------------------------------------|---------------------------------------------------------------|---------------------------------------------------------------|---------------------------------------------------------------|---------------------------------------------------------------|
| CCDC                                                                         | 2072843                                                       | 2072840                                                       | 2072846                                                       | 2072849                                                       | 2072844                                                       | 2072841                                                       | 2072842                                                       |
| Empirical formula                                                            | C <sub>18</sub> H <sub>18</sub> N <sub>4</sub> O <sub>2</sub> | C <sub>22</sub> H <sub>26</sub> N <sub>4</sub> O <sub>6</sub> | C <sub>24</sub> H <sub>28</sub> N <sub>4</sub> O <sub>3</sub> | C <sub>24</sub> H <sub>30</sub> N <sub>4</sub> O <sub>5</sub> | C <sub>19</sub> H <sub>20</sub> N <sub>4</sub> O <sub>4</sub> | C <sub>22</sub> H <sub>26</sub> N <sub>4</sub> O <sub>5</sub> | C <sub>19</sub> H <sub>22</sub> N <sub>4</sub> O <sub>3</sub> |
| Formula weight                                                               | 322.36                                                        | 442.47                                                        | 420.50                                                        | 454.52                                                        | 368.39                                                        | 426.47                                                        | 354.40                                                        |
| T, K                                                                         | 120                                                           | 120                                                           | 120                                                           | 120                                                           | 100                                                           | 120                                                           | 120                                                           |
| Crystal system                                                               | Monoclinic                                                    | Monoclinic                                                    | Monoclinic                                                    | Triclinic                                                     | Triclinic                                                     | Orthorhombic                                                  | Triclinic                                                     |
| Space group                                                                  | P2 <sub>1</sub> /c                                            | P2 <sub>1</sub>                                               | P2 <sub>1</sub> /c                                            | P-1                                                           | P-1                                                           | P2 <sub>1</sub> 2 <sub>1</sub> 2 <sub>1</sub>                 | P-1                                                           |
| Z / Z'                                                                       | 4 / 1                                                         | 4 / 2                                                         | 4 / 1                                                         | 4 / 2                                                         | 2 / 1                                                         | 4 / 1                                                         | 2 / 1                                                         |
| a, Å                                                                         | 15.1775(15)                                                   | 8.340(2)                                                      | 10.5144(6)                                                    | 10.8013(8)                                                    | 9.2955(10)                                                    | 10.8660(5)                                                    | 9.4667(10)                                                    |
| b, Å                                                                         | 11.3912(11)                                                   | 25.809(7)                                                     | 13.2689(7)                                                    | 14.8820(11)                                                   | 9.6189(10)                                                    | 12.6977(6)                                                    | 9.5371(10)                                                    |
| c, Å                                                                         | 9.0508(9)                                                     | 10.622(3)                                                     | 15.6124(8)                                                    | 16.5499(12)                                                   | 11.1769(12)                                                   | 15.5356(7)                                                    | 10.9139(11)                                                   |
| α, °                                                                         |                                                               |                                                               |                                                               | 100.2147(16)                                                  | 68.975(2)                                                     |                                                               | 71.045(2)                                                     |
| β, °                                                                         | 99.279(2)                                                     | 94.689(7)                                                     | 91.5967(12)                                                   | 108.5370(16)                                                  | 70.514(2)                                                     |                                                               | 72.014(2)                                                     |
| γ, °                                                                         |                                                               |                                                               |                                                               | 109.0343(17)                                                  | 82.886(2)                                                     |                                                               | 82.789(2)                                                     |
| V, Å <sup>3</sup>                                                            | 1544.3(3)                                                     | 2278.7(11)                                                    | 2177.3(2)                                                     | 2264.1(3)                                                     | 879.38(16)                                                    | 2143.50(17)                                                   | 886.04(16)                                                    |
| d <sub>calc</sub> , g cm <sup>-3</sup>                                       | 1.386                                                         | 1.290                                                         | 1.283                                                         | 1.333                                                         | 1.391                                                         | 1.322                                                         | 1.328                                                         |
| μ, cm <sup>-1</sup>                                                          | 0.94                                                          | 0.95                                                          | 0.86                                                          | 0.95                                                          | 1.00                                                          | 0.95                                                          | 0.92                                                          |
| Reflns collected                                                             | 20184                                                         | 40191                                                         | 28543                                                         | 50823                                                         | 11709                                                         | 27874                                                         | 19210                                                         |
| Independent reflns [Rint]                                                    | 4509<br>[0.0572]                                              | 13265<br>[0.1111]                                             | 6342 [0.0558]                                                 | 13207 [0.0663]                                                | 5116 [0.0225]                                                 | 6254<br>[0.0253]                                              | 5177 [0.0298]                                                 |
| Observed refls [I>2σ(I)]                                                     | 3354                                                          | 7289                                                          | 4582                                                          | 8478                                                          | 4354                                                          | 5690                                                          | 4058                                                          |
| Parameters                                                                   | 227                                                           | 602                                                           | 290                                                           | 652                                                           | 258                                                           | 296                                                           | 250                                                           |
| R1                                                                           | 0.0478                                                        | 0.0765                                                        | 0.0473                                                        | 0.0500                                                        | 0.0410                                                        | 0.0353                                                        | 0.0414                                                        |
| wR2                                                                          | 0.1224                                                        | 0.1784                                                        | 0.1177                                                        | 0.1256                                                        | 0.1090                                                        | 0.0989                                                        | 0.1085                                                        |
| GOF                                                                          | 1.019                                                         | 1.022                                                         | 1.009                                                         | 1.020                                                         | 1.037                                                         | 1.014                                                         | 1.025                                                         |
| Residual density, e Å <sup>-3</sup><br>(d <sub>min</sub> /d <sub>max</sub> ) | 0.440/<br>-0.238                                              | 0.362/<br>-0.388                                              | 0.399/<br>-0.239                                              | 0.381/<br>-0.243                                              | 0.400/<br>-0.257                                              | 0.309/<br>-0.177                                              | 0.375/<br>-0.224                                              |

**Table TS2** Crystal data and structure refinement for **1b** solid forms.

|                                                                              | <b>1b</b>                                                     | <b>1b</b> ·CH <sub>3</sub> COOH                               | <b>1b</b> ·C <sub>4</sub> H <sub>8</sub> O <sub>2</sub>       | <b>1b</b> ·C <sub>2</sub> H <sub>5</sub> OH                   | <b>1b</b> ·CHOOH                                              | <b>1b</b> ·(CH <sub>3</sub> ) <sub>2</sub> CO                 | <b>1b</b> ·CH <sub>3</sub> CN                                 | <b>1b</b> ·CH <sub>3</sub> OH                                 | <b>1b</b> ·C <sub>5</sub> H <sub>5</sub> N                    |
|------------------------------------------------------------------------------|---------------------------------------------------------------|---------------------------------------------------------------|---------------------------------------------------------------|---------------------------------------------------------------|---------------------------------------------------------------|---------------------------------------------------------------|---------------------------------------------------------------|---------------------------------------------------------------|---------------------------------------------------------------|
| CCDC                                                                         | 2072845                                                       | 2072855                                                       | 2072853                                                       | 2072848                                                       | 2072847                                                       | 2072850                                                       | 2072854                                                       | 2072852                                                       | 2072851                                                       |
| Empirical formula                                                            | C <sub>20</sub> H <sub>22</sub> N <sub>4</sub> O <sub>2</sub> | C <sub>22</sub> H <sub>26</sub> N <sub>4</sub> O <sub>4</sub> | C <sub>24</sub> H <sub>30</sub> N <sub>4</sub> O <sub>4</sub> | C <sub>22</sub> H <sub>28</sub> N <sub>4</sub> O <sub>3</sub> | C <sub>21</sub> H <sub>24</sub> N <sub>4</sub> O <sub>4</sub> | C <sub>23</sub> H <sub>28</sub> N <sub>4</sub> O <sub>3</sub> | C <sub>22</sub> H <sub>25</sub> N <sub>5</sub> O <sub>2</sub> | C <sub>21</sub> H <sub>26</sub> N <sub>4</sub> O <sub>3</sub> | C <sub>25</sub> H <sub>27</sub> N <sub>5</sub> O <sub>2</sub> |
| Formula weight                                                               | 350.41                                                        | 410.47                                                        | 438.52                                                        | 396.48                                                        | 396.44                                                        | 408.49                                                        | 391.47                                                        | 382.46                                                        | 429.51                                                        |
| T, K                                                                         | 120                                                           | 120                                                           | 120                                                           | 120                                                           | 120                                                           | 120                                                           | 120                                                           | 120                                                           | 120                                                           |
| Crystal system                                                               | Monoclinic                                                    | Monoclinic                                                    | Triclinic                                                     | Triclinic                                                     | Monoclinic                                                    | Triclinic                                                     | Monoclinic                                                    | Monoclinic                                                    | Triclinic                                                     |
| Space group                                                                  | P2 <sub>1</sub> /c                                            | P2 <sub>1</sub> /c                                            | P-1                                                           | P-1                                                           | P2 <sub>1</sub> /c                                            | P-1                                                           | P2 <sub>1</sub> /c                                            | P2 <sub>1</sub> /c                                            | P-1                                                           |
| Z / Z'                                                                       | 8 / 2                                                         | 8 / 2                                                         | 2 / 1                                                         | 4 / 2                                                         | 4 / 1                                                         | 2 / 1                                                         | 4 / 1                                                         | 4 / 1                                                         | 4 / 2                                                         |
| a, Å                                                                         | 12.3392(12)                                                   | 14.6755(14)                                                   | 8.2337(9)                                                     | 12.5231(9)                                                    | 8.9850(4)                                                     | 8.0523(10)                                                    | 12.6677(14)                                                   | 12.7245(7)                                                    | 13.2527(11)                                                   |
| b, Å                                                                         | 8.4864(8)                                                     | 17.8903(16)                                                   | 10.7773(12)                                                   | 12.9844(10)                                                   | 23.1322(11)                                                   | 10.7345(13)                                                   | 9.9394(11)                                                    | 9.4309(5)                                                     | 13.5955(11)                                                   |
| c, Å                                                                         | 34.065(3)                                                     | 16.1564(15)                                                   | 12.9970(14)                                                   | 13.4742(10)                                                   | 9.9624(5)                                                     | 13.0559(16)                                                   | 16.7019(18)                                                   | 17.0038(9)                                                    | 14.5032(12)                                                   |
| α, °                                                                         |                                                               |                                                               | 98.025(3)                                                     | 103.8760(16)                                                  |                                                               | 97.828(3)                                                     |                                                               |                                                               | 112.4997(17)                                                  |
| β, °                                                                         | 99.814(2)                                                     | 91.586(2)                                                     | 97.959(3)                                                     | 96.9424(17)                                                   | 109.7820(10)                                                  | 97.868(3)                                                     | 101.334(2)                                                    | 100.2190(10)                                                  | 98.1336(17)                                                   |
| γ, °                                                                         |                                                               |                                                               | 91.457(3)                                                     | 97.1860(17)                                                   |                                                               | 91.711(3)                                                     |                                                               |                                                               | 104.9098(18)                                                  |
| V, Å <sup>3</sup>                                                            | 3515.0(6)                                                     | 4240.2(7)                                                     | 1129.8(2)                                                     | 2084.3(3)                                                     | 1948.42(16)                                                   | 1106.1(2)                                                     | 2061.9(4)                                                     | 2008.15(19)                                                   | 2247.1(3)                                                     |
| d <sub>calc</sub> , g cm <sup>-3</sup>                                       | 1.324                                                         | 1.286                                                         | 1.289                                                         | 1.264                                                         | 1.351                                                         | 1.226                                                         | 1.261                                                         | 1.265                                                         | 1.270                                                         |
| μ, cm <sup>-1</sup>                                                          | 0.88                                                          | 0.90                                                          | 0.89                                                          | 0.86                                                          | 0.95                                                          | 0.83                                                          | 0.84                                                          | 0.86                                                          | 0.83                                                          |
| Refls collected                                                              | 45663                                                         | 56043                                                         | 15161                                                         | 37248                                                         | 16615                                                         | 14838                                                         | 44091                                                         | 26222                                                         | 30094                                                         |
| Independent refls<br>[Rint]                                                  | 10234<br>[0.0917]                                             | 12373<br>[0.0940]                                             | 6587<br>[0.0452]                                              | 12149<br>[0.0558]                                             | 5602<br>[0.0353]                                              | 6439<br>[0.0600]                                              | 6006<br>[0.0630]                                              | 5856<br>[0.0565]                                              | 13077<br>[0.0376]                                             |
| Observed refls<br>[I > 2σ(I)]                                                | 6428                                                          | 7075                                                          | 4495                                                          | 8319                                                          | 4269                                                          | 3845                                                          | 4303                                                          | 4144                                                          | 8879                                                          |
| Parameters                                                                   | 489                                                           | 571                                                           | 299                                                           | 578                                                           | 276                                                           | 302                                                           | 273                                                           | 268                                                           | 597                                                           |
| R1                                                                           | 0.0586                                                        | 0.0553                                                        | 0.0532                                                        | 0.0572                                                        | 0.0483                                                        | 0.0584                                                        | 0.0474                                                        | 0.0459                                                        | 0.0530                                                        |
| wR2                                                                          | 0.1412                                                        | 0.1302                                                        | 0.1283                                                        | 0.1510                                                        | 0.1153                                                        | 0.1403                                                        | 0.1266                                                        | 0.1213                                                        | 0.1466                                                        |
| GOF                                                                          | 1.009                                                         | 1.010                                                         | 1.030                                                         | 1.014                                                         | 1.028                                                         | 1.009                                                         | 1.016                                                         | 1.014                                                         | 1.025                                                         |
| Residual density, e<br>Å <sup>-3</sup> (d <sub>min</sub> /d <sub>max</sub> ) | 0.344/<br>-0.270                                              | 0.255/<br>-0.327                                              | 0.422/<br>-0.262                                              | 0.681/<br>-0.294                                              | 0.411/<br>-0.241                                              | 0.331/<br>-0.253                                              | 0.366/<br>-0.233                                              | 0.357/<br>-0.222                                              | 0.375/<br>-0.234                                              |

## 2. Asymmetric unit and crystal packing images

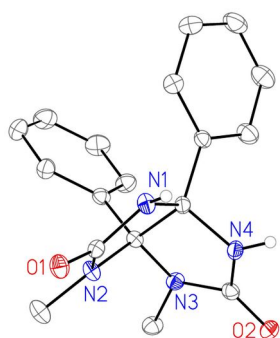

**1a**

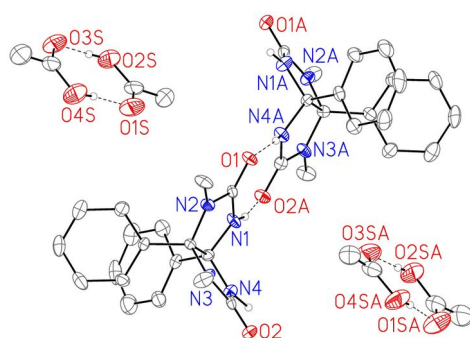

**1a·2(CH<sub>3</sub>COOH)**

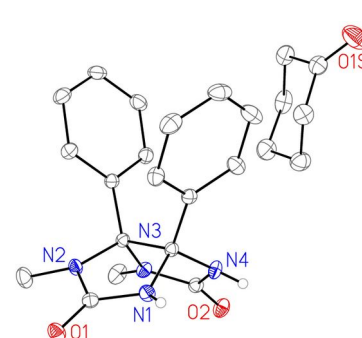

**1a·C<sub>6</sub>H<sub>10</sub>O**

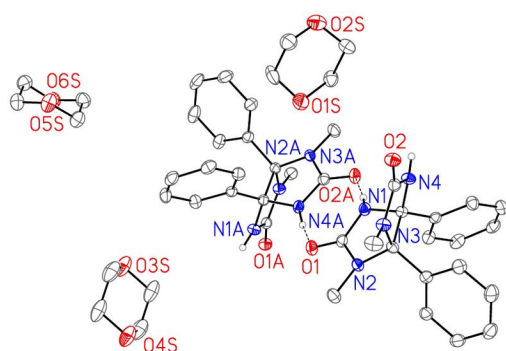

**1a·1.5(C<sub>4</sub>H<sub>8</sub>O<sub>2</sub>)**

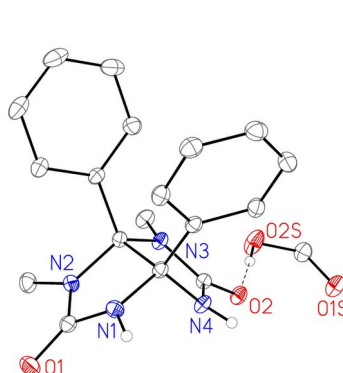

**1a·CHOOH**

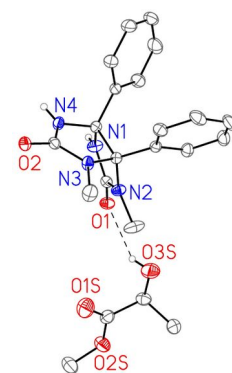

**1a·C<sub>4</sub>H<sub>8</sub>O<sub>3</sub>**

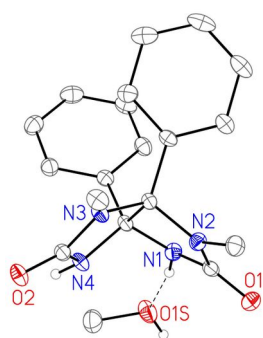

**1a·CH<sub>3</sub>OH**

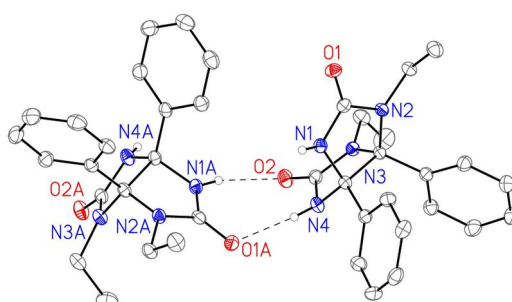

**1b**

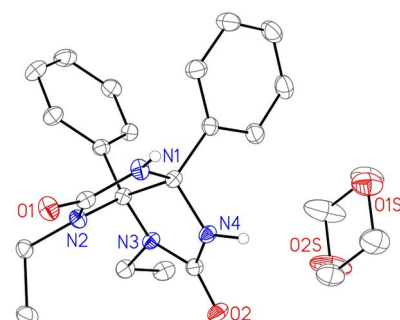

**1b·C<sub>4</sub>H<sub>8</sub>O<sub>2</sub>**

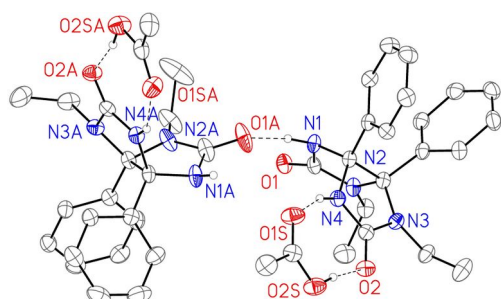

**1b·CH<sub>3</sub>COOH**

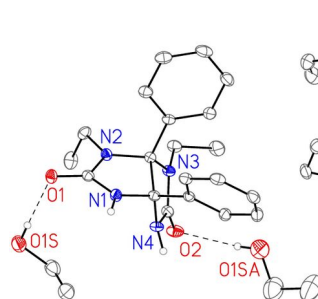

**1b·C<sub>2</sub>H<sub>5</sub>OH**

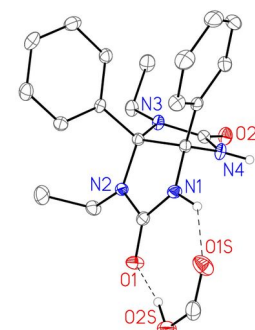

**1b·CHOOH**

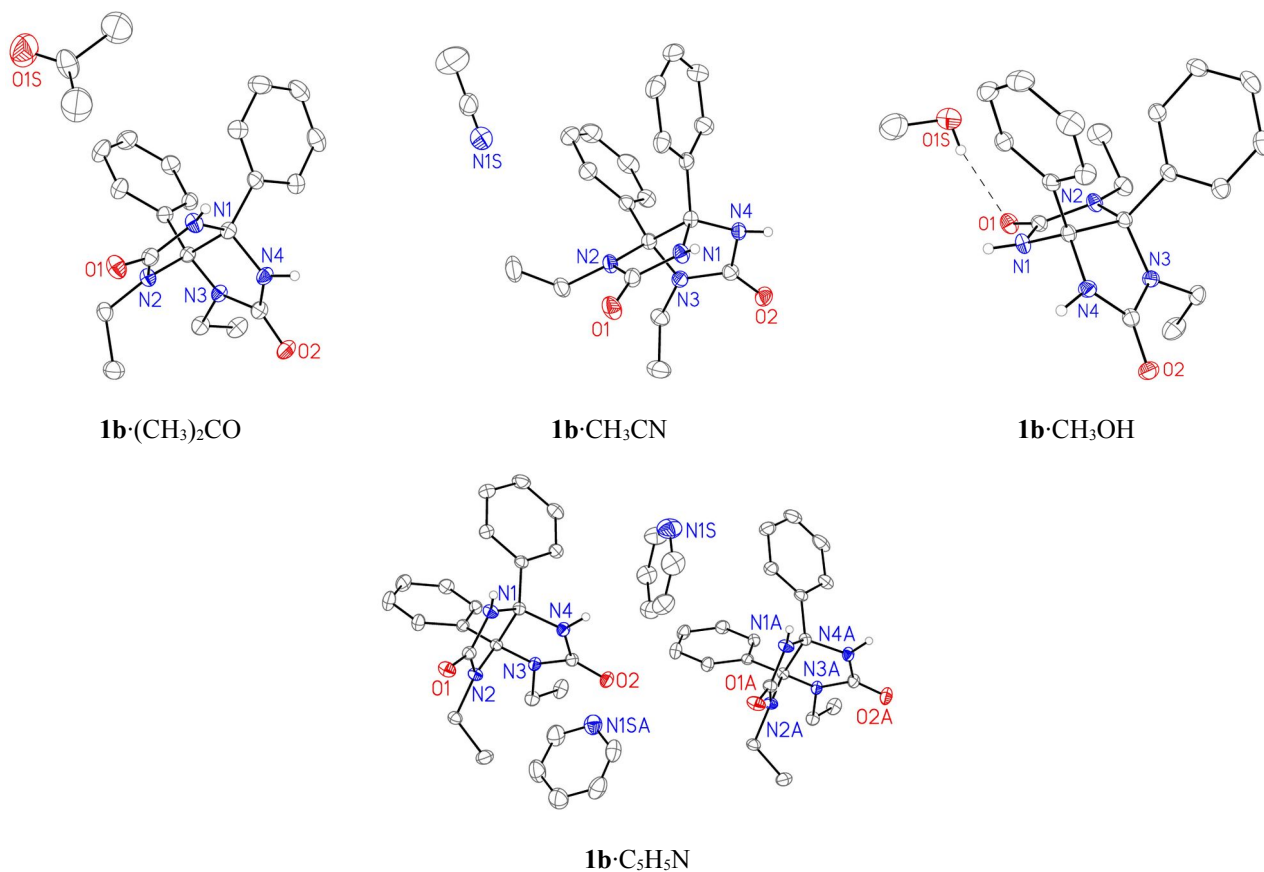

**Fig. S1** Asymmetric units of the structures studied in representation of atoms with thermal ellipsoids ( $p=50\%$ ). The minor components of the disordered structures **1a**·C<sub>4</sub>H<sub>8</sub>O<sub>2</sub>, **1b**·(CH<sub>3</sub>)<sub>2</sub>CO and **1b**·C<sub>2</sub>H<sub>5</sub>OH and hydrogen atoms connected to carbon atoms are omitted for clarity.

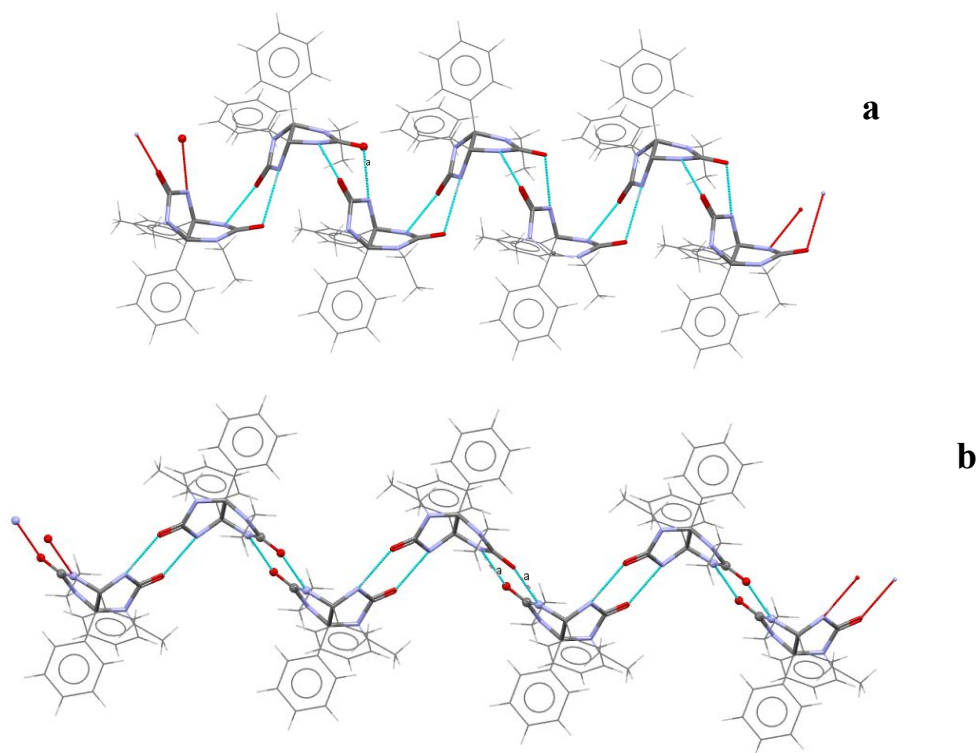

**Fig. S2** “Waved” and “zigzag” conformations of H-bonded chains in structures **1b** (a) and **1b**·C<sub>4</sub>H<sub>8</sub>O<sub>2</sub> (b). H-bonds are dotted blue.



### 3. CE-B3LYP calculations

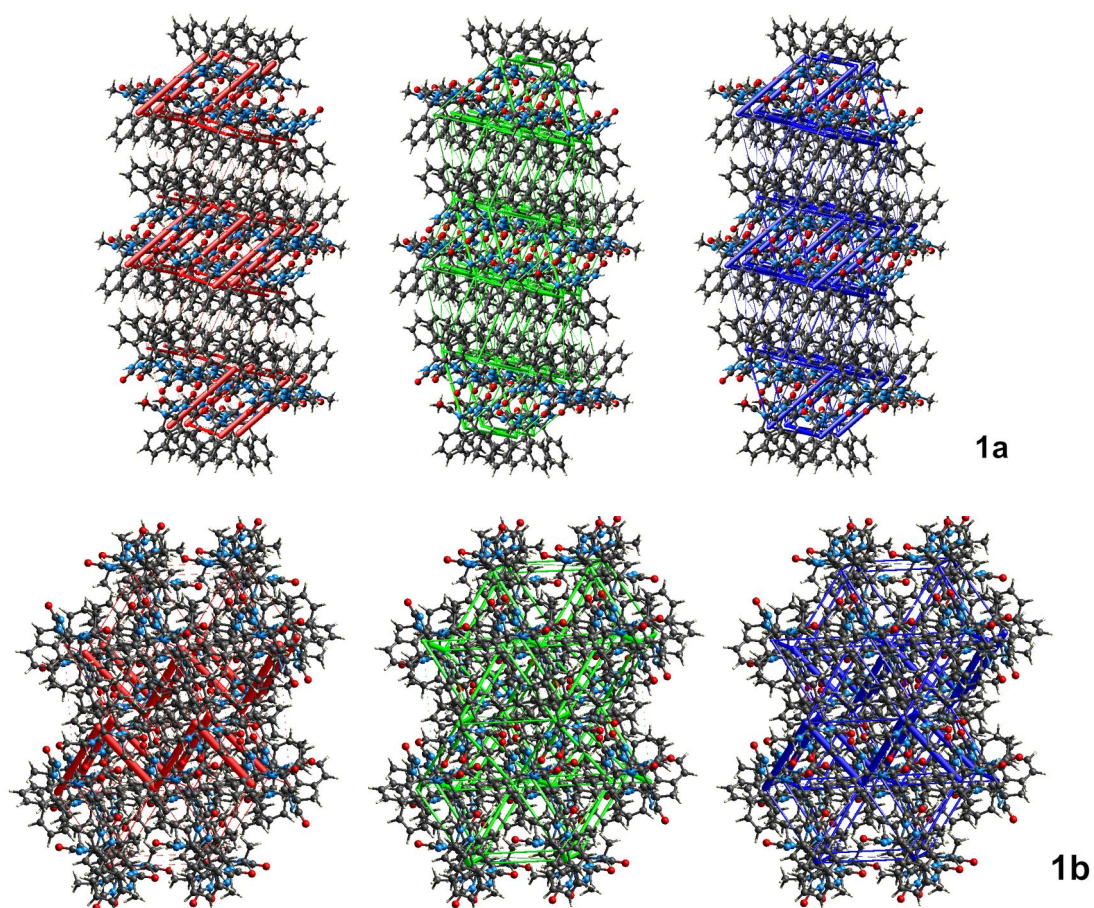

**Fig. S3** Coulomb (red), dispersion (green) and total (blue) energy frameworks for **1a** and **1b**.

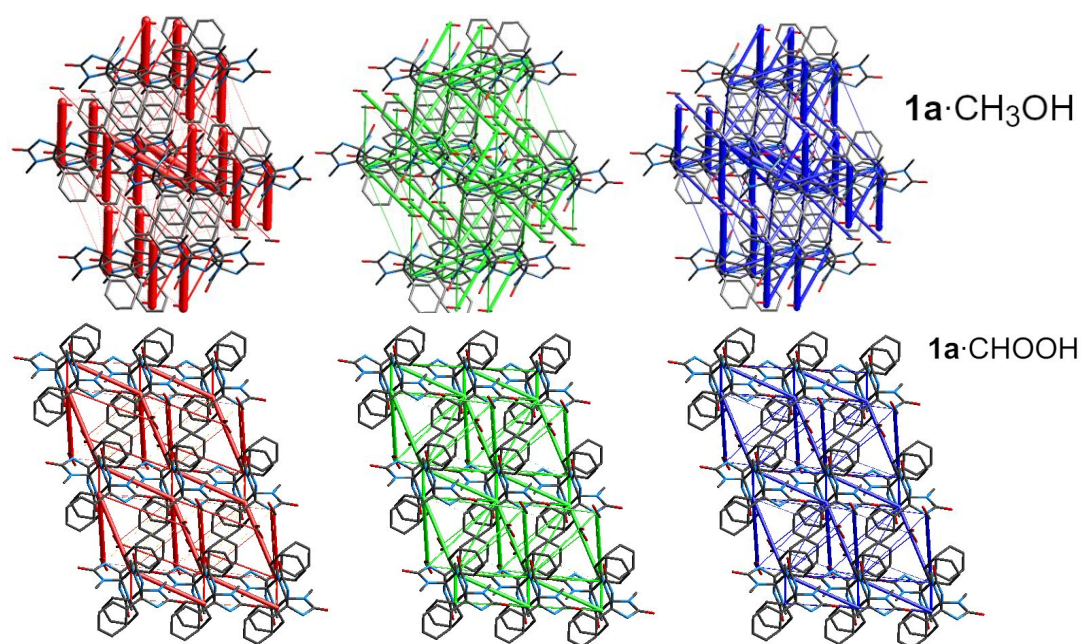

**Fig. S4** Coulomb (red), dispersion (green) and total (blue) energy frameworks for **1a** and **1b**.

**Table TS3** CE-B3LYP interaction energies (kJ mol<sup>-1</sup>) for **1a**

| N | Symop             | R     | Electron Density | E_ele | E_pol | E_dis | E_rep | E_tot |
|---|-------------------|-------|------------------|-------|-------|-------|-------|-------|
| 2 | -x, y+1/2, -z+1/2 | 8.70  | B3LYP/6-31G(d,p) | 0.6   | -4.9  | -15.4 | 9.4   | -10.6 |
| 2 | x, -y+1/2, z+1/2  | 7.29  | B3LYP/6-31G(d,p) | -37.9 | -12.3 | -36.7 | 46.3  | -52.6 |
| 1 | -x, -y, -z        | 7.71  | B3LYP/6-31G(d,p) | -2    | -7.3  | -43.8 | 32.7  | -25.4 |
| 1 | -x, -y, -z        | 8.24  | B3LYP/6-31G(d,p) | -76.8 | -18.4 | -18.6 | 67.7  | -69.2 |
| 2 | x, -y+1/2, z+1/2  | 7.26  | B3LYP/6-31G(d,p) | -3    | -2.8  | -37.8 | 21.7  | -24.8 |
| 1 | -x, -y, -z        | 8.58  | B3LYP/6-31G(d,p) | -6.1  | -1.1  | -33.7 | 22.7  | -22.6 |
| 2 | -x, y+1/2, -z+1/2 | 10.58 | B3LYP/6-31G(d,p) | -1.4  | -0.4  | -12   | 8     | -7.3  |

**Table TS4** CE-B3LYP interaction energies (kJ mol<sup>-1</sup>) for **1a**·CH<sub>3</sub>OH

| N                       | Symop      | R     | Electron Density | E_ele | E_pol | E_dis | E_rep | E_tot |
|-------------------------|------------|-------|------------------|-------|-------|-------|-------|-------|
| <b>1a</b>               |            |       |                  |       |       |       |       |       |
| 1                       | -          | 4.96  | B3LYP/6-31G(d,p) | -36.1 | -9.1  | -14.2 | 42.6  | -31   |
| 1                       | -x, -y, -z | 6.66  | B3LYP/6-31G(d,p) | -6.9  | -4.8  | -39   | 17.5  | -34   |
| 1                       | -x, -y, -z | 8.00  | B3LYP/6-31G(d,p) | -19.6 | -7.5  | -43   | 37.1  | -40.7 |
| 1                       | -          | 6.54  | B3LYP/6-31G(d,p) | -47.5 | -11.7 | -7.1  | 53.5  | -32.1 |
| 1                       | -x, -y, -z | 8.22  | B3LYP/6-31G(d,p) | -88.5 | -22   | -21   | 85.7  | -75.2 |
| 1                       | -          | 7.2   | B3LYP/6-31G(d,p) | -2.1  | -2.3  | -5.3  | 4.7   | -5.6  |
| 2                       | x, y, z    | 9.47  | B3LYP/6-31G(d,p) | -3.2  | -1.6  | -13   | 4.8   | -12.9 |
| 1                       | -x, -y, -z | 9.64  | B3LYP/6-31G(d,p) | 0.7   | -0.4  | -20.7 | 12.5  | -9.9  |
| 1                       | -x, -y, -z | 6.61  | B3LYP/6-31G(d,p) | -8.4  | -2.5  | -48.8 | 28.4  | -35.6 |
| 1                       | -          | 8.05  | B3LYP/6-31G(d,p) | -1.4  | -0.4  | -4.9  | 2.6   | -4.4  |
| 1                       | -x, -y, -z | 7.92  | B3LYP/6-31G(d,p) | -4.4  | -0.8  | -31.9 | 15    | -23.8 |
| 1                       | -          | 7.27  | B3LYP/6-31G(d,p) | -5.8  | -1.8  | -5.7  | 9.6   | -6.6  |
| 1                       | -          | 6.25  | B3LYP/6-31G(d,p) | -3.1  | -0.7  | -12.4 | 8     | -9.6  |
| 1                       | -x, -y, -z | 10.46 | B3LYP/6-31G(d,p) | -6.8  | -0.5  | -1.8  | 0     | -9.1  |
| 1                       | -          | 8.8   | B3LYP/6-31G(d,p) | 0.7   | 0     | -0.5  | 0     | 0.3   |
| <b>CH<sub>3</sub>OH</b> |            |       |                  |       |       |       |       |       |
| 1                       | -          | 6.54  | B3LYP/6-31G(d,p) | 0.8   | -0.1  | -1.2  | 0     | -0.3  |
| 1                       | -          | 6.25  | B3LYP/6-31G(d,p) | -8.4  | -2.5  | -48.8 | 28.4  | -35.6 |
| 1                       | -x, -y, -z | 4.85  | B3LYP/6-31G(d,p) | -0.8  | -0.1  | -0.3  | 0     | -1.2  |
| 1                       | -x, -y, -z | 5.03  | B3LYP/6-31G(d,p) | -0.2  | 0     | -0.1  | 0     | -0.3  |
| 1                       | -          | 8.05  | B3LYP/6-31G(d,p) | -1.1  | -0.3  | -1.3  | 0     | -2.6  |
| 1                       | -          | 7.27  | B3LYP/6-31G(d,p) | -0.3  | -0.1  | -0.3  | 0     | -0.6  |
| 1                       | -          | 7.5   | B3LYP/6-31G(d,p) | -0.8  | -0.1  | -0.3  | 0     | -1.2  |
| 1                       | -          | 4.96  | B3LYP/6-31G(d,p) | -88.5 | -22   | -21   | 85.8  | -75.2 |

**Table TS5** CE-B3LYP interaction energies (kJ mol<sup>-1</sup>) for **1a**·CHOOH

| N            | Symop      | R    | Electron Density | E_ele | E_pol | E_dis | E_rep | E_tot |
|--------------|------------|------|------------------|-------|-------|-------|-------|-------|
| <b>1a</b>    |            |      |                  |       |       |       |       |       |
| 1            | -x, -y, -z | 8.24 | B3LYP/6-31G(d,p) | -79.7 | -19.8 | -19.3 | 66.3  | -74.9 |
| 2            | x, y, z    | 9.62 | B3LYP/6-31G(d,p) | -1.2  | -1.9  | -11.1 | 3.9   | -9.9  |
| 1            | -x, -y, -z | 7.95 | B3LYP/6-31G(d,p) | -20.9 | -7.9  | -40.9 | 40.6  | -38.6 |
| 1            | -          | 7.91 | B3LYP/6-31G(d,p) | 0.4   | -0.1  | -1.3  | 0     | -0.7  |
| 1            | -x, -y, -z | 6.50 | B3LYP/6-31G(d,p) | -11.8 | -5.4  | -46.4 | 31.1  | -37.7 |
| 1            | -x, -y, -z | 6.63 | B3LYP/6-31G(d,p) | -11.2 | -3.3  | -45.8 | 27.7  | -37.1 |
| 1            | -x, -y, -z | 9.69 | B3LYP/6-31G(d,p) | 0.6   | -0.4  | -20.6 | 12.7  | -9.8  |
| 2            | x, y, z    | 9.3  | B3LYP/6-31G(d,p) | -0.9  | -0.7  | -16.7 | 9     | -10.4 |
| 1            | -x, -y, -z | 7.84 | B3LYP/6-31G(d,p) | -5.3  | -1    | -33.9 | 16.8  | -25.5 |
| 1            | -          | 7.8  | B3LYP/6-31G(d,p) | 0.6   | -0.4  | -20.6 | 12.7  | -9.8  |
| 1            | -          | 5.98 | B3LYP/6-31G(d,p) | -1.2  | -1.9  | -11.1 | 3.9   | -9.9  |
| 1            | -          | 8.08 | B3LYP/6-31G(d,p) | -0.9  | -0.7  | -16.7 | 9     | -10.4 |
| 1            | -          | 7.68 | B3LYP/6-31G(d,p) | -11.8 | -5.4  | -46.4 | 31.1  | -37.7 |
| 1            | -          | 7.24 | B3LYP/6-31G(d,p) | -4    | -0.2  | -1.1  | 0     | -5.4  |
| <b>HCOOH</b> |            |      |                  |       |       |       |       |       |
| 1            | -          | 7.68 | B3LYP/6-31G(d,p) | -11.8 | -5.4  | -46.4 | 31.1  | -37.7 |
| 1            | -          | 7.24 | B3LYP/6-31G(d,p) | -4    | -0.2  | -1.1  | 0     | -5.4  |
| 1            | -          | 8.08 | B3LYP/6-31G(d,p) | -0.9  | -0.7  | -16.7 | 9     | -10.4 |
| 1            | -          | 7.8  | B3LYP/6-31G(d,p) | 0.6   | -0.4  | -20.6 | 12.7  | -9.8  |
| 1            | -          | 7.91 | B3LYP/6-31G(d,p) | 0.4   | -0.1  | -1.3  | 0     | -0.7  |
| 1            | -x, -y, -z | 3.92 | B3LYP/6-31G(d,p) | -0.3  | 0     | -0.2  | 0     | -0.5  |
| 1            | -          | 6.35 | B3LYP/6-31G(d,p) | -79.7 | -19.8 | -19.3 | 66.3  | -74.9 |
| 1            | -          | 5.98 | B3LYP/6-31G(d,p) | -1.2  | -1.9  | -11.1 | 3.9   | -9.9  |



**Table TS6** CE-B3LYP interaction energies (kJ mol<sup>-1</sup>) for **1b**

| N                        | Symop             | R     | Electron Density | E_ele | E_pol | E_dis | E_rep | E_tot |
|--------------------------|-------------------|-------|------------------|-------|-------|-------|-------|-------|
| 1 <sup>st</sup> molecule |                   |       |                  |       |       |       |       |       |
| 1                        | -                 | 7.39  | B3LYP/6-31G(d,p) | -76.1 | -19.9 | -33.3 | 78.4  | -75.8 |
| 1                        | -                 | 8.4   | B3LYP/6-31G(d,p) | -4.8  | -1.1  | -38.1 | 22.9  | -25   |
| 1                        | -                 | 12.05 | B3LYP/6-31G(d,p) | 0.1   | -0.3  | -6.2  | 2.9   | -3.7  |
| 2                        | x, y, z           | 8.49  | B3LYP/6-31G(d,p) | -2.9  | -4.9  | -22.2 | 11.2  | -19.1 |
| 1                        | -                 | 7.21  | B3LYP/6-31G(d,p) | -87.8 | -22.1 | -46.2 | 110.1 | -81.4 |
| 1                        | -                 | 14.18 | B3LYP/6-31G(d,p) | -0.3  | -0.1  | -0.3  | 0     | -0.6  |
| 1                        | x, y, z           | 14.98 | B3LYP/6-31G(d,p) | 0     | 0     | -0.2  | 0     | -0.2  |
| 1                        | -x, -y, -z        | 14.36 | B3LYP/6-31G(d,p) | 0.7   | -0.1  | -0.3  | 0     | 0.4   |
| 1                        | x, y, z           | 12.34 | B3LYP/6-31G(d,p) | -1.3  | -0.2  | -1.3  | 0     | -2.6  |
| 1                        | -x, y+1/2, -z+1/2 | 12.99 | B3LYP/6-31G(d,p) | -0.2  | 0     | -0.5  | 0     | -0.7  |
| 1                        | -                 | 10.15 | B3LYP/6-31G(d,p) | -8.1  | -2.9  | -18.1 | 12.2  | -18.9 |
| 1                        | -                 | 8.2   | B3LYP/6-31G(d,p) | -8.2  | -1.2  | -38   | 27.2  | -25.7 |
| 1                        | -                 | 8.05  | B3LYP/6-31G(d,p) | -10   | -1.6  | -44.3 | 34.6  | -29   |
| 2 <sup>nd</sup> molecule |                   |       |                  |       |       |       |       |       |
| 1                        | -                 | 7.39  | B3LYP/6-31G(d,p) | -76.1 | -19.9 | -33.3 | 78.4  | -75.8 |
| 1                        | -                 | 8.4   | B3LYP/6-31G(d,p) | -4.8  | -1.1  | -38.1 | 22.9  | -25   |
| 2                        | x, y, z           | 8.49  | B3LYP/6-31G(d,p) | -2.9  | -4.9  | -22.2 | 11.2  | -19.1 |
| 1                        | -                 | 7.21  | B3LYP/6-31G(d,p) | -87.8 | -22.1 | -46.2 | 110.1 | -81.4 |
| 1                        | -                 | 10.15 | B3LYP/6-31G(d,p) | -8.1  | -2.9  | -18.1 | 12.2  | -18.9 |
| 1                        | -                 | 8.2   | B3LYP/6-31G(d,p) | -8.2  | -1.2  | -38   | 27.2  | -25.7 |
| 1                        | -                 | 8.05  | B3LYP/6-31G(d,p) | -10   | -1.6  | -44.3 | 34.6  | -29   |
| 1                        | -x, -y, -z        | 7.13  | B3LYP/6-31G(d,p) | -10.6 | -1.7  | -68.4 | 42.6  | -45.7 |

**Table TS7** CE-B3LYP interaction energies (kJ mol<sup>-1</sup>) for **1b**·CH<sub>3</sub>CN

| N           | Symop             | R     | Electron Density | E_ele | E_pol | E_dis | E_rep | E_tot |
|-------------|-------------------|-------|------------------|-------|-------|-------|-------|-------|
| <b>1b</b>   |                   |       |                  |       |       |       |       |       |
| 1           | -                 | 8.55  | B3LYP/6-31G(d,p) | -3.1  | -1.5  | -3.7  | 3.3   | -5.5  |
| 2           | -x, y+1/2, -z+1/2 | 8.09  | B3LYP/6-31G(d,p) | -84   | -20.7 | -21.9 | 83.2  | -71.8 |
| 1           | -x, -y, -z        | 9.68  | B3LYP/6-31G(d,p) | -6.6  | -3.7  | -18.3 | 9     | -20.1 |
| 1           | -                 | 5.68  | B3LYP/6-31G(d,p) | -18.8 | -5.3  | -15.3 | 20.1  | -24.7 |
| 1           | -x, -y, -z        | 9.51  | B3LYP/6-31G(d,p) | -17.9 | -8.8  | -24.7 | 24.2  | -32   |
| 1           | -                 | 5.85  | B3LYP/6-31G(d,p) | -3.2  | -2.8  | -21   | 13.7  | -15.2 |
| 2           | -x, y+1/2, -z+1/2 | 8.25  | B3LYP/6-31G(d,p) | -6.4  | -0.8  | -37   | 21.9  | -26.1 |
| 2           | x, -y+1/2, z+1/2  | 8.35  | B3LYP/6-31G(d,p) | -4    | -1.4  | -36.7 | 20.6  | -24.5 |
| 1           | -                 | 5.94  | B3LYP/6-31G(d,p) | -4.3  | -1.9  | -13.2 | 9.1   | -11.8 |
| 1           | -                 | 7.52  | B3LYP/6-31G(d,p) | -2.3  | -1.3  | -5.8  | 7.3   | -4    |
| 1           | -x, -y, -z        | 11.88 | B3LYP/6-31G(d,p) | 0.4   | -0.2  | -3.3  | 0.2   | -2.4  |
| 1           | x, -y+1/2, z+1/2  | 13.74 | B3LYP/6-31G(d,p) | -0.9  | -0.1  | -0.7  | 0     | -1.6  |
| <b>MeCN</b> |                   |       |                  |       |       |       |       |       |
| 1           | -                 | 8.55  | B3LYP/6-31G(d,p) | -3.1  | -1.5  | -3.7  | 3.3   | -5.5  |
| 2           | -x, y+1/2, -z+1/2 | 8.09  | B3LYP/6-31G(d,p) | -84   | -20.7 | -21.9 | 83.2  | -71.8 |
| 1           | -x, -y, -z        | 9.68  | B3LYP/6-31G(d,p) | -6.6  | -3.7  | -18.3 | 9     | -20.1 |
| 1           | -                 | 5.68  | B3LYP/6-31G(d,p) | -18.8 | -5.3  | -15.3 | 20.1  | -24.7 |
| 1           | -x, -y, -z        | 9.51  | B3LYP/6-31G(d,p) | -17.9 | -8.8  | -24.7 | 24.2  | -32   |
| 1           | -                 | 5.85  | B3LYP/6-31G(d,p) | -3.2  | -2.8  | -21   | 13.7  | -15.2 |
| 2           | -x, y+1/2, -z+1/2 | 8.25  | B3LYP/6-31G(d,p) | -6.4  | -0.8  | -37   | 21.9  | -26.1 |
| 2           | x, -y+1/2, z+1/2  | 8.35  | B3LYP/6-31G(d,p) | -4    | -1.4  | -36.7 | 20.6  | -24.5 |
| 1           | -                 | 5.94  | B3LYP/6-31G(d,p) | -4.3  | -1.9  | -13.2 | 9.1   | -11.8 |
| 1           | -                 | 7.52  | B3LYP/6-31G(d,p) | -2.3  | -1.3  | -5.8  | 7.3   | -4    |
| 1           | -x, -y, -z        | 11.88 | B3LYP/6-31G(d,p) | 0.4   | -0.2  | -3.3  | 0.2   | -2.4  |
| 1           | x, -y+1/2, z+1/2  | 13.74 | B3LYP/6-31G(d,p) | -0.9  | -0.1  | -0.7  | 0     | -1.6  |

**Table TS8** CE-B3LYP interaction energies (kJ mol<sup>-1</sup>) for **1a**·CH<sub>3</sub>OH

| N           | Symop             | R     | Electron Density | E_ele | E_pol | E_dis | E_rep | E_tot |
|-------------|-------------------|-------|------------------|-------|-------|-------|-------|-------|
| <b>1b</b>   |                   |       |                  |       |       |       |       |       |
| 1           | -                 | 5.55  | B3LYP/6-31G(d,p) | -0.3  | -1.4  | -15.8 | 10.4  | -8.7  |
| 2           | -x, y+1/2, -z+1/2 | 8.05  | B3LYP/6-31G(d,p) | -85.3 | -21.6 | -22.8 | 84.5  | -73.9 |
| 1           | -x, -y, -z        | 9.53  | B3LYP/6-31G(d,p) | -9    | -4.7  | -23.6 | 18.5  | -22   |
| 1           | -                 | 5.31  | B3LYP/6-31G(d,p) | -33.3 | -7.5  | -15   | 35.4  | -32   |
| 1           | -x, -y, -z        | 9.86  | B3LYP/6-31G(d,p) | -12.7 | -7    | -18.5 | 13.6  | -26.4 |
| 2           | -x, y+1/2, -z+1/2 | 8.05  | B3LYP/6-31G(d,p) | -8.8  | -1    | -42.8 | 29.3  | -29.2 |
| 2           | x, -y+1/2, z+1/2  | 8.51  | B3LYP/6-31G(d,p) | -4.4  | -1.5  | -36.7 | 20.8  | -24.8 |
| 1           | -                 | 5.09  | B3LYP/6-31G(d,p) | -8.2  | -1.8  | -14.2 | 10.2  | -16.1 |
| 1           | -                 | 7.23  | B3LYP/6-31G(d,p) | -6.4  | -2.2  | -6.7  | 6.3   | -10.4 |
| 1           | -                 | 7.67  | B3LYP/6-31G(d,p) | -0.9  | -0.2  | -5.6  | 3.1   | -4    |
| 1           | x, y, z           | 12.72 | B3LYP/6-31G(d,p) | -1    | -0.1  | -0.9  | 0     | -1.9  |
| <b>MeOH</b> |                   |       |                  |       |       |       |       |       |
| 1           | -                 | 5.55  | B3LYP/6-31G(d,p) | -0.3  | -1.4  | -15.8 | 10.4  | -8.7  |
| 2           | -x, y+1/2, -z+1/2 | 8.05  | B3LYP/6-31G(d,p) | -85.3 | -21.6 | -22.8 | 84.5  | -73.9 |
| 1           | -x, -y, -z        | 9.53  | B3LYP/6-31G(d,p) | -9    | -4.7  | -23.6 | 18.5  | -22   |
| 1           | -                 | 5.31  | B3LYP/6-31G(d,p) | -33.3 | -7.5  | -15   | 35.4  | -32   |
| 1           | -x, -y, -z        | 9.86  | B3LYP/6-31G(d,p) | -12.7 | -7    | -18.5 | 13.6  | -26.4 |
| 2           | -x, y+1/2, -z+1/2 | 8.05  | B3LYP/6-31G(d,p) | -8.8  | -1    | -42.8 | 29.3  | -29.2 |
| 2           | x, -y+1/2, z+1/2  | 8.51  | B3LYP/6-31G(d,p) | -4.4  | -1.5  | -36.7 | 20.8  | -24.8 |
| 1           | -                 | 5.09  | B3LYP/6-31G(d,p) | -8.2  | -1.8  | -14.2 | 10.2  | -16.1 |
| 1           | -                 | 7.23  | B3LYP/6-31G(d,p) | -6.4  | -2.2  | -6.7  | 6.3   | -10.4 |
| 1           | -                 | 7.67  | B3LYP/6-31G(d,p) | -0.9  | -0.2  | -5.6  | 3.1   | -4    |
| 1           | x, y, z           | 12.72 | B3LYP/6-31G(d,p) | -1    | -0.1  | -0.9  | 0     | -1.9  |
| 1           | -x, -y, -z        | 12.04 | B3LYP/6-31G(d,p) | 1     | -0.3  | -6.3  | 2     | -3.4  |

## 4. Crystal morphology

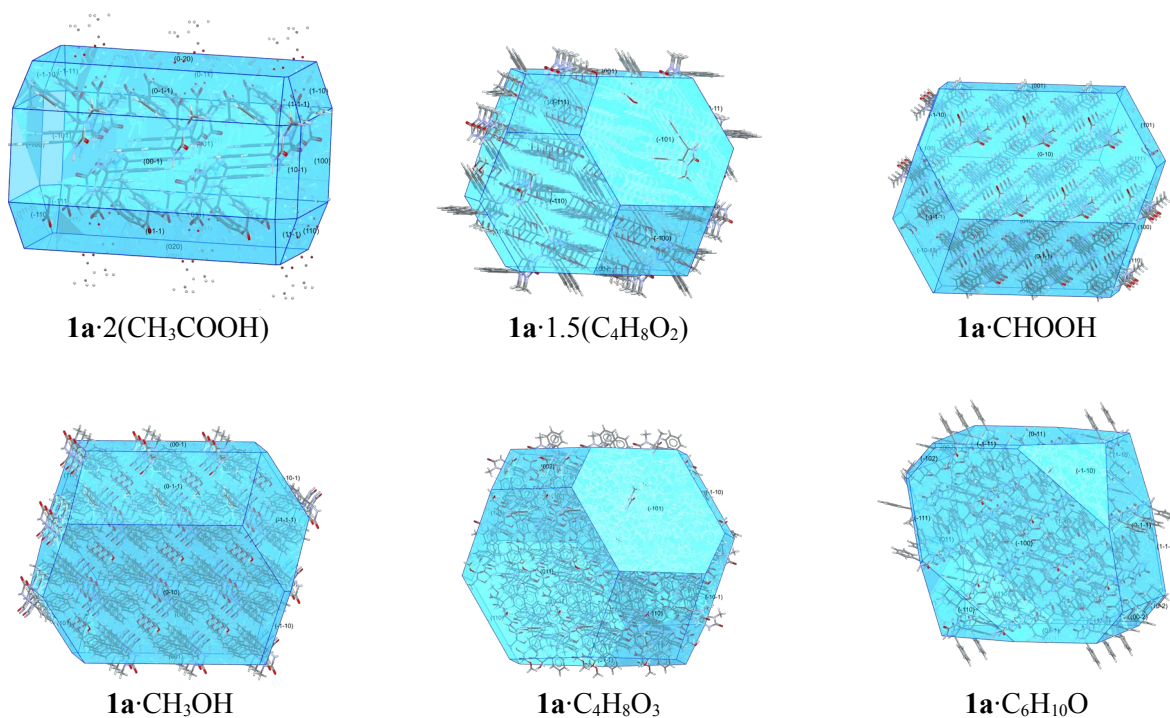

**Fig. S5** BFDH predicted morphology (blue, prismatic) and groups forming the main crystal faces for **1a·2(CH<sub>3</sub>COOH)** (amide and carboxylate), **1a·1.5(C<sub>4</sub>H<sub>8</sub>O<sub>2</sub>)** (a mixture of alkyl/aryl groups and amide residues/oxygen atoms of solvent molecules), **1a·CHOOH** a mixture of alkyl/aryl groups and amide residues/oxygen atoms of solvent molecules), **1a·CH<sub>3</sub>OH** (amide groups of glycouril molecules), **1a·C<sub>4</sub>H<sub>8</sub>O<sub>3</sub>**, **1a·C<sub>6</sub>H<sub>10</sub>O**.

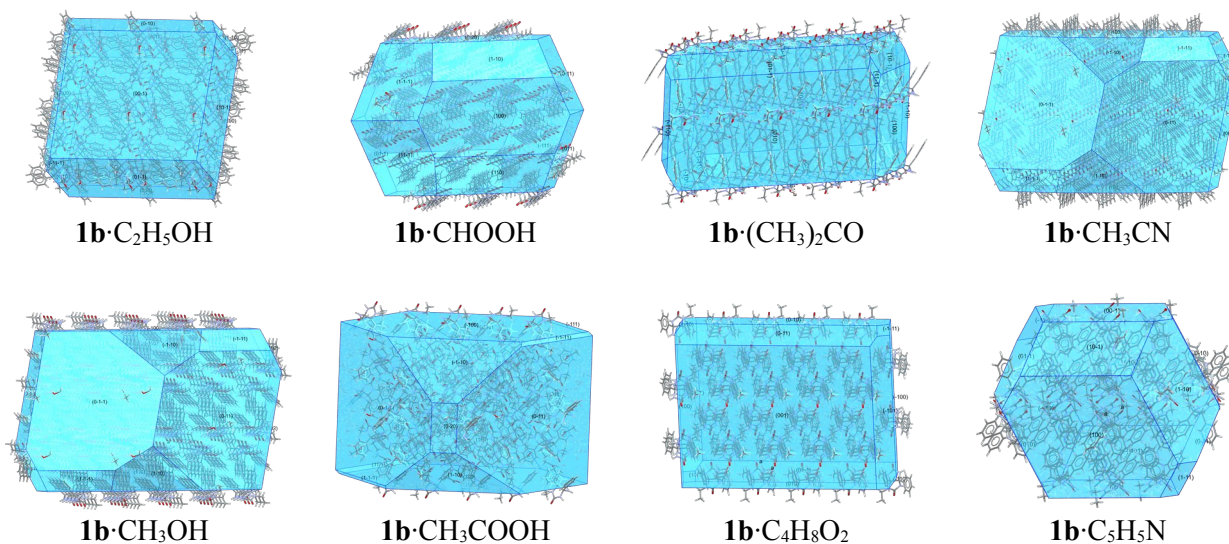

**Fig. S6.** BFDH predicted morphology (blue, prismatic) and groups forming the main crystal faces for **1b·C<sub>2</sub>H<sub>5</sub>OH**, **1b·CHOOH**, **1b·(CH<sub>3</sub>)<sub>2</sub>CO**, **1b·CH<sub>3</sub>CN**, **1b·CH<sub>3</sub>OH**, **1b·CH<sub>3</sub>COOH**, **1b·C<sub>4</sub>H<sub>8</sub>O<sub>2</sub>**, **1b·C<sub>5</sub>H<sub>5</sub>N**.

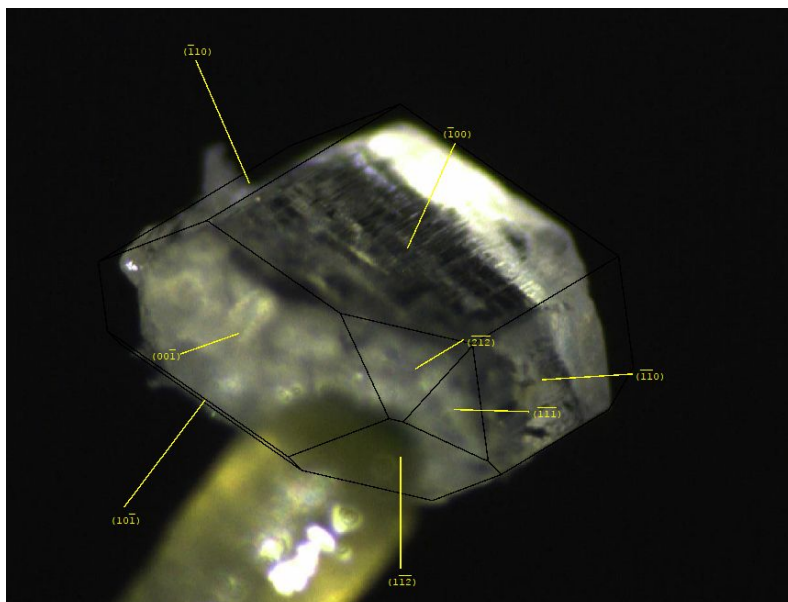

**Fig. S7** Experimentally assigned crystal faces of **1a**.

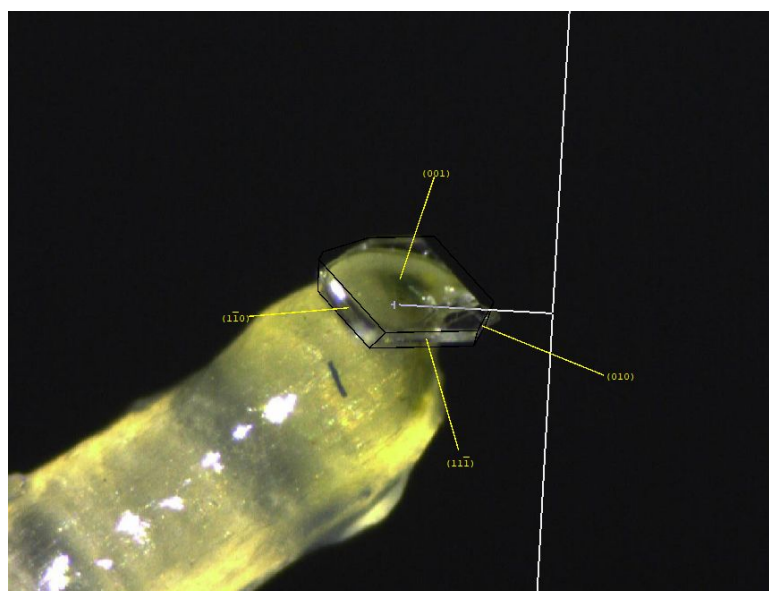

**Fig. S8** Experimentally assigned crystal faces of **1a**.

## 5. Powder diffraction

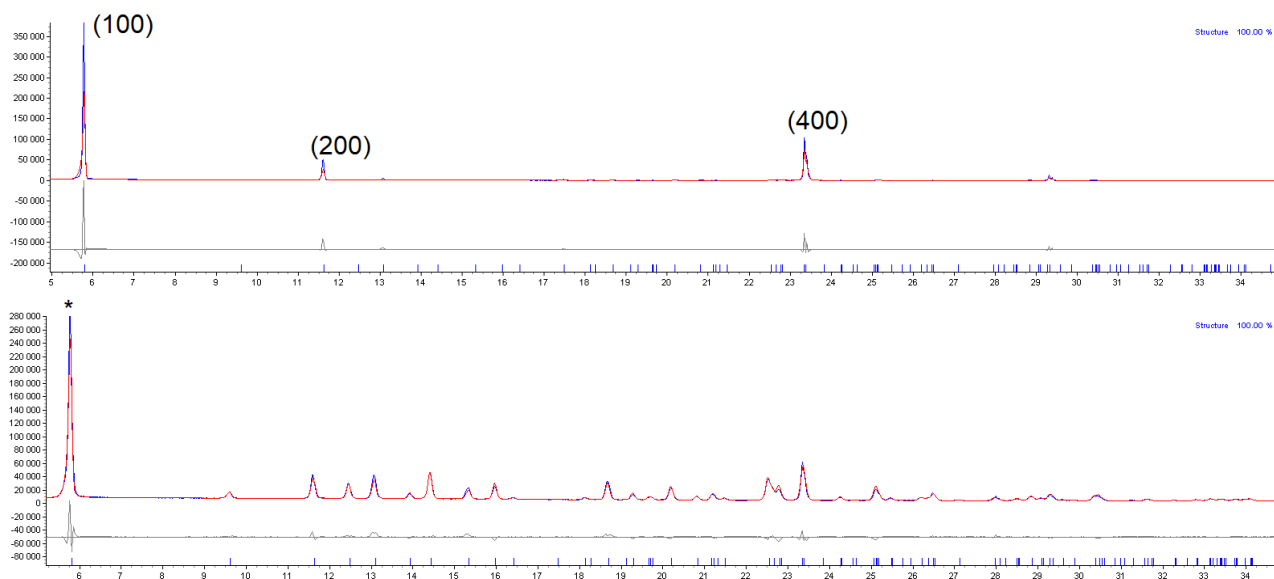

**Fig. S9** The experimental (blue), calculated (red) and their difference (grey) curves for powder XRD patterns for as crystallized solid (top) **1a** and (bottom) powdered **1a**. For the former and latter patterns  $R_{wp}/R_{bragg} = 33.57/17.91$  and  $8.53/5.82$ . Crystallite size for powder pattern is 900 nm.

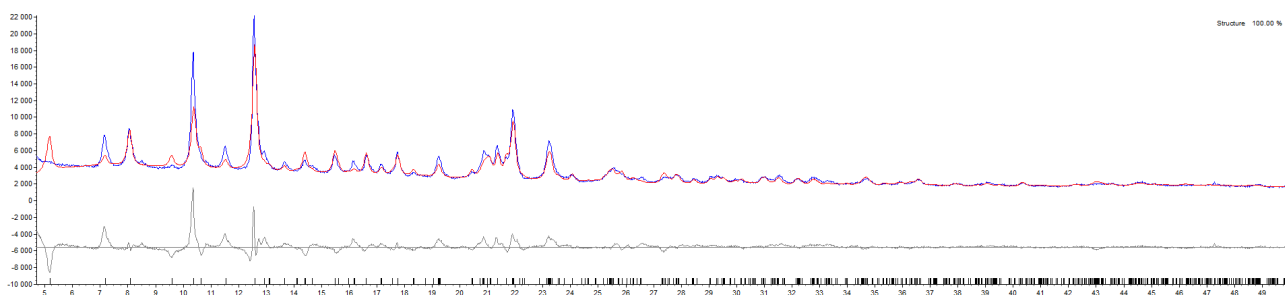

**Fig. S10** The experimental (blue) and calculated (red) powder XRD pattern for **1b** and their difference (grey) curves are depicted.  $R_{wp}/R_{bragg} = 10.3/8.7$  % indicates purity of the sample.

## 6. Measurements of hydrophobic properties

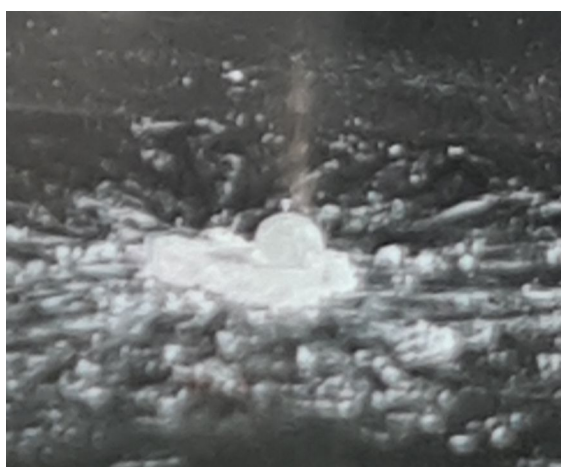

**Fig. S11** Drops of water on powder of **1a**.



## 7. Analytical data for 2a and 2b

### 1,4-Dimethyl-3a,6a-diphenyltetrahydroimidazo[4,5-*d*]imidazole-2,5(1*H*,3*H*)-dione 2a.

White powder, yield 0.77 g (24%), mp 340 – 343 °C (HCOOH). <sup>1</sup>H NMR, δ, ppm.; *J*/Hz (300 MHz, DMSO-*d*<sub>6</sub>): 2.51 (s, 6 H, Me), 6.92 – 7.01 (m, 4 H, Ph), 7.03 – 7.17 (m, 6 H, Ph), 8.41 (s, 2 H, NH). <sup>13</sup>C **1a** NMR, δ, ppm.; (75 MHz, DMSO-*d*<sub>6</sub>): 25.63 (Me), 83.41 (C-C), 127.37, 128.04, 128.36 (CH(Ph)), 135.11 (C(Ph)), 159.32 (C=O). HRMS, *m/z*, found: 323.1511 [M+H]<sup>+</sup> (calcd for C<sub>18</sub>H<sub>18</sub>N<sub>4</sub>O<sub>2</sub>+H 323.1508).

### 1,4-Diethyl-3a,6a-diphenyltetrahydroimidazo[4,5-*d*]imidazole-2,5(1*H*,3*H*)-dione 2b.

White powder, yield 0.70 g (20%), mp > 335 °C (HCOOH). <sup>1</sup>H NMR, δ, ppm.; *J*/Hz (300 MHz, DMSO-*d*<sub>6</sub>): 0.99 (t, 6 H, Me, *J* = 7.0 Hz), 2.70 – 2.88 (m, 2 H, CH<sub>2</sub>), 3.12 – 3.30 (m, 2 H, CH<sub>2</sub>), 6.92 – 7.01 (m, 4 H, Ph), 7.03 – 7.17 (m, 6 H, Ph), 8.26 (s, 2 H, NH). <sup>13</sup>C NMR, δ, ppm.; (75 MHz, DMSO-*d*<sub>6</sub>): 14.61 (Me), 35.02 (CH<sub>2</sub>), 83.76 (C-C), 127.33, 127.61, 128.11 (CH(Ph)), 136.08 (C(Ph)), 159.02 (C=O). HRMS, *m/z*, found: 351.1817 [M+H]<sup>+</sup> (calcd for C<sub>20</sub>H<sub>22</sub>N<sub>4</sub>O<sub>2</sub>+H 351.1821).

## 8. NMR spectra for samples 1a·MeOH, 1b, 2a,2b

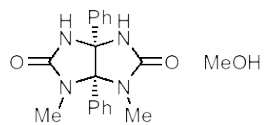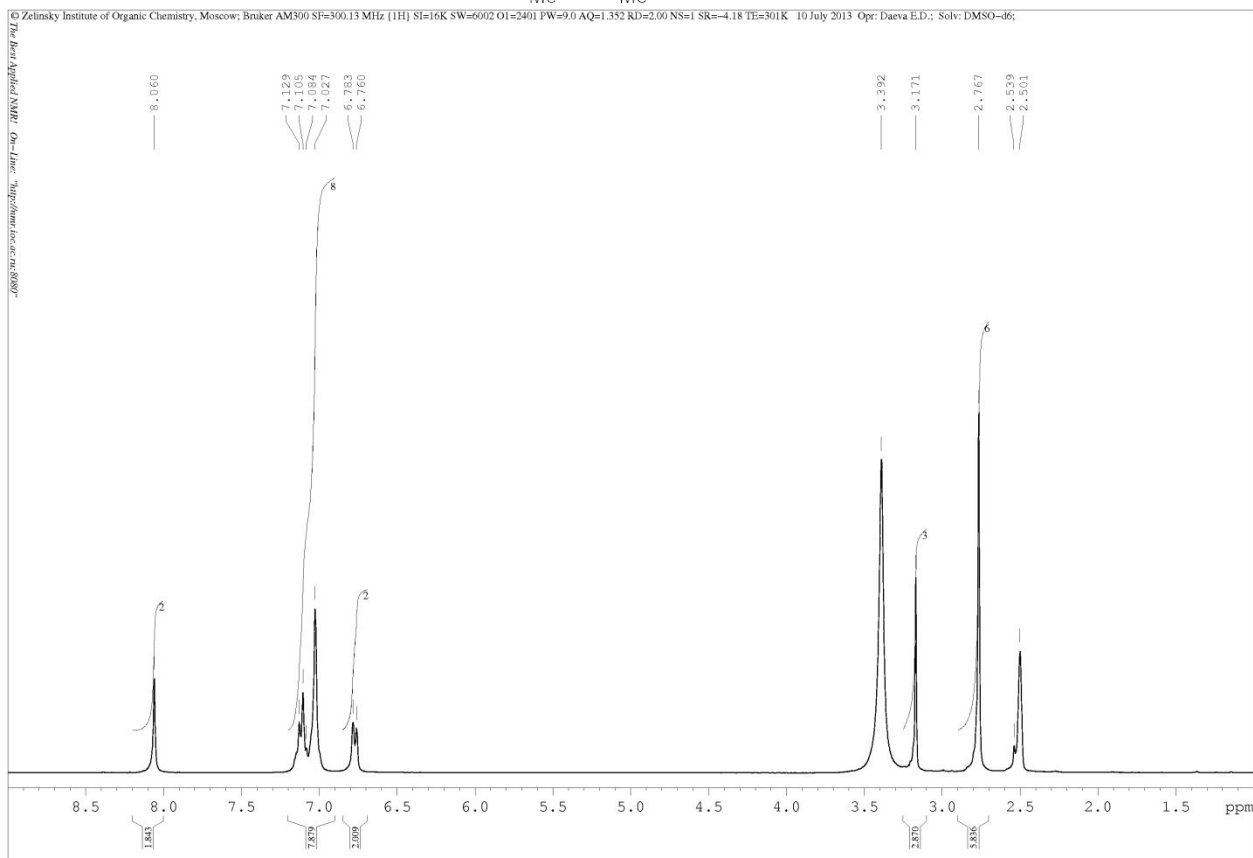

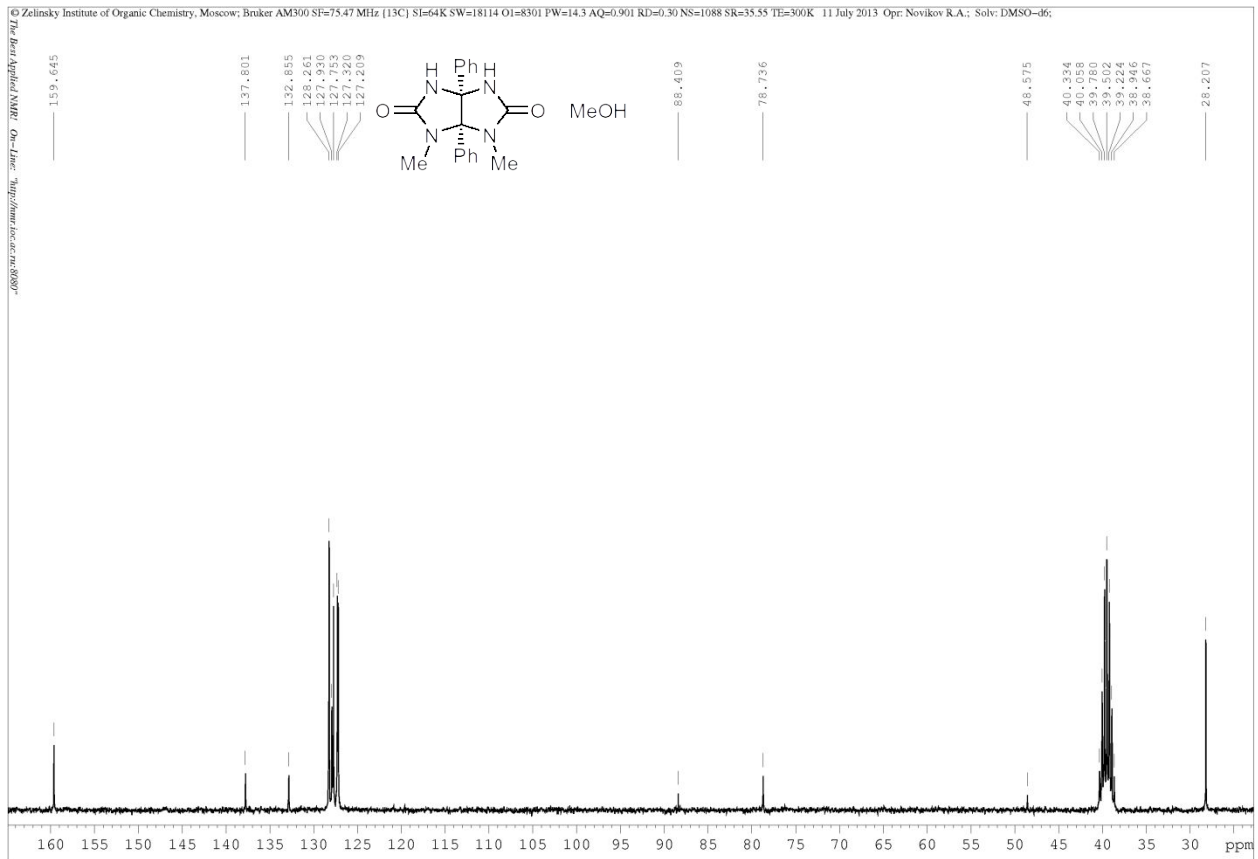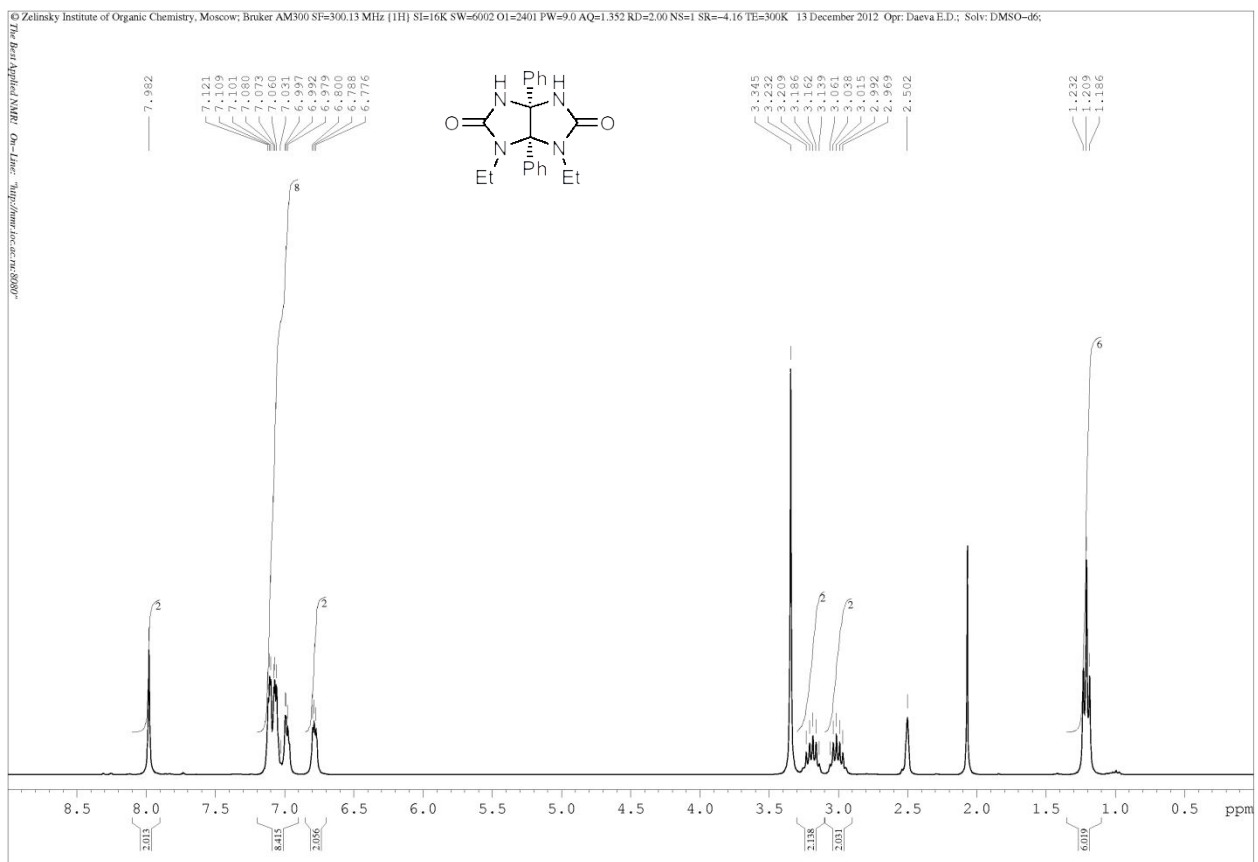

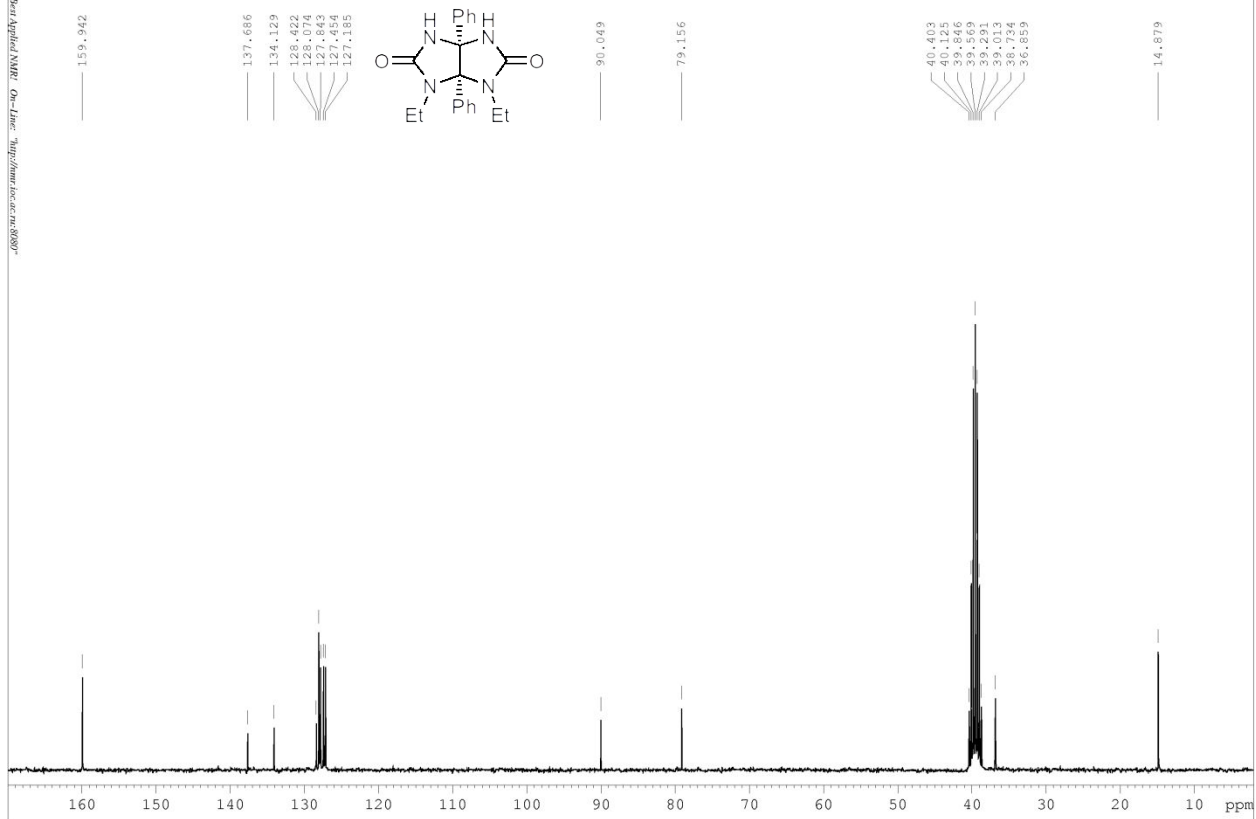

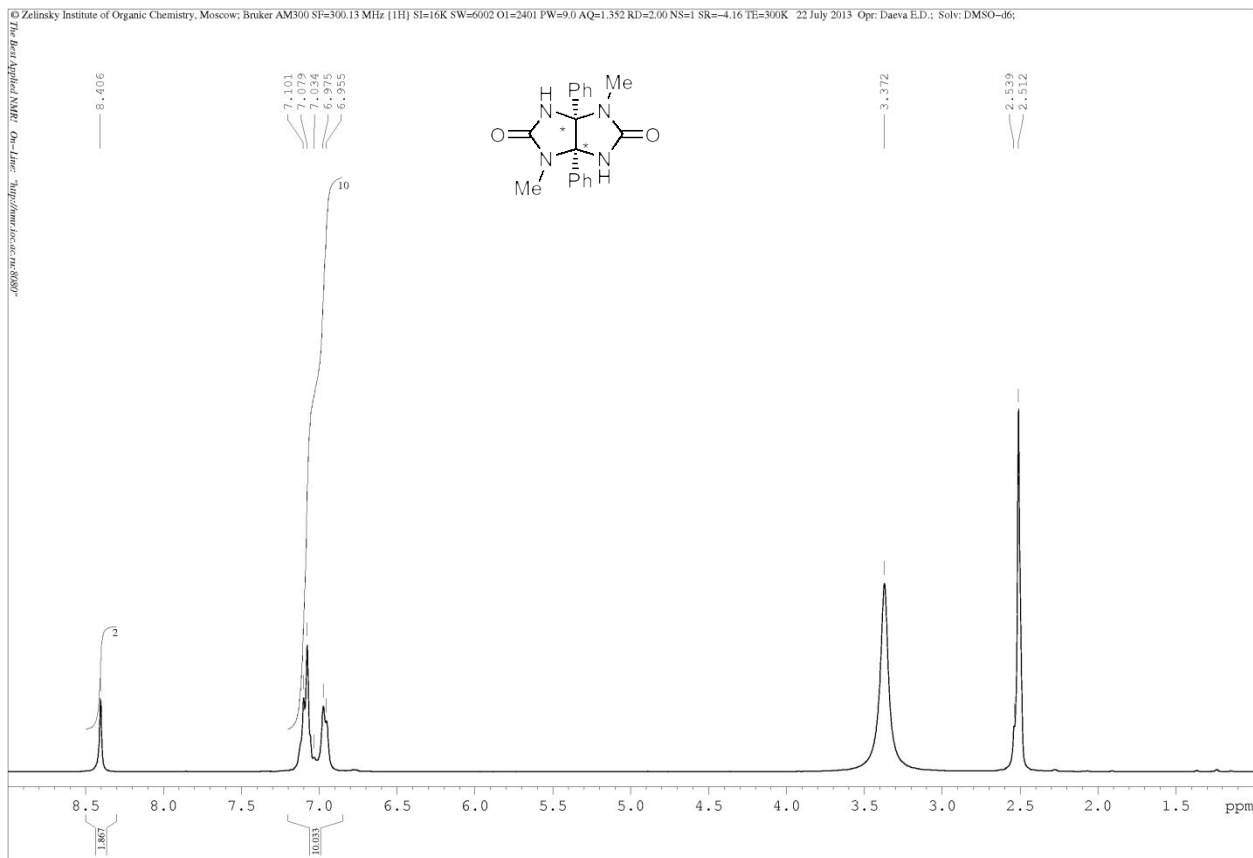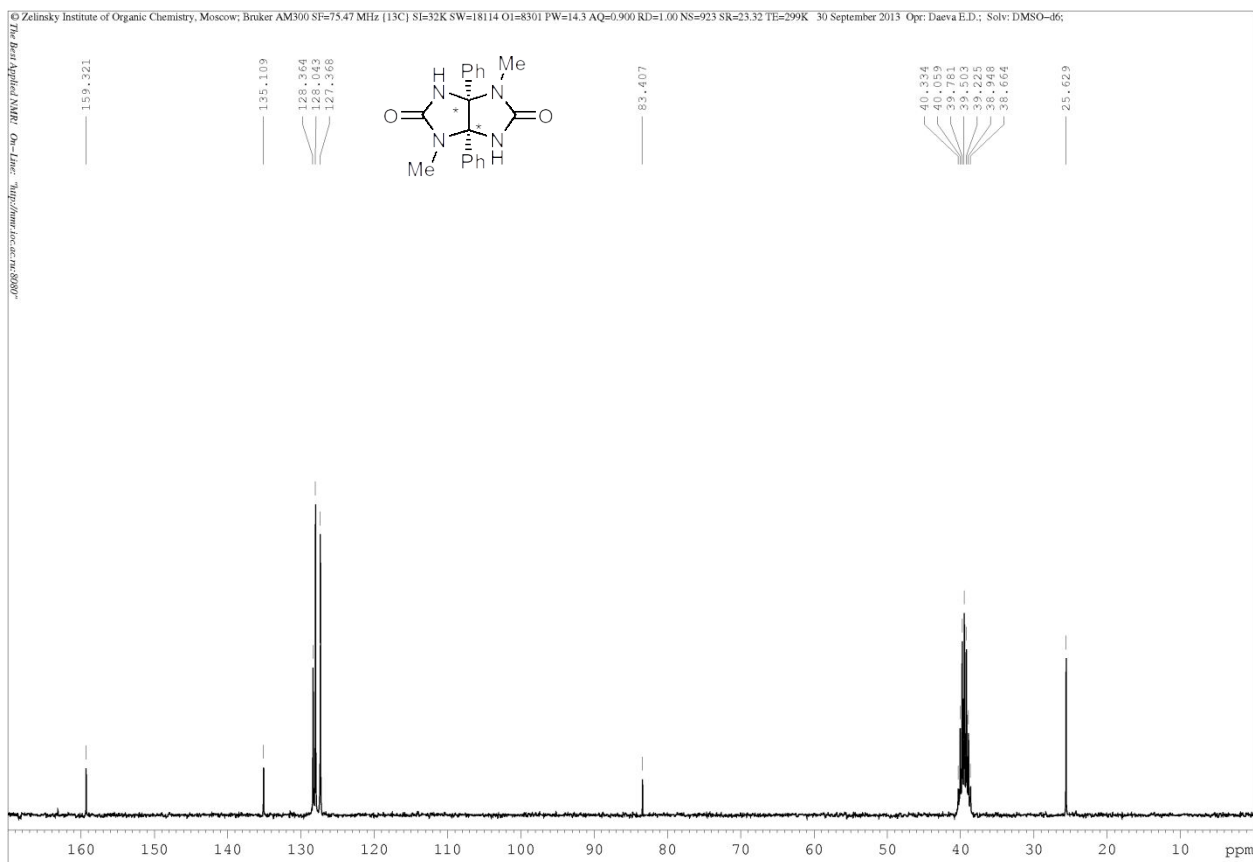

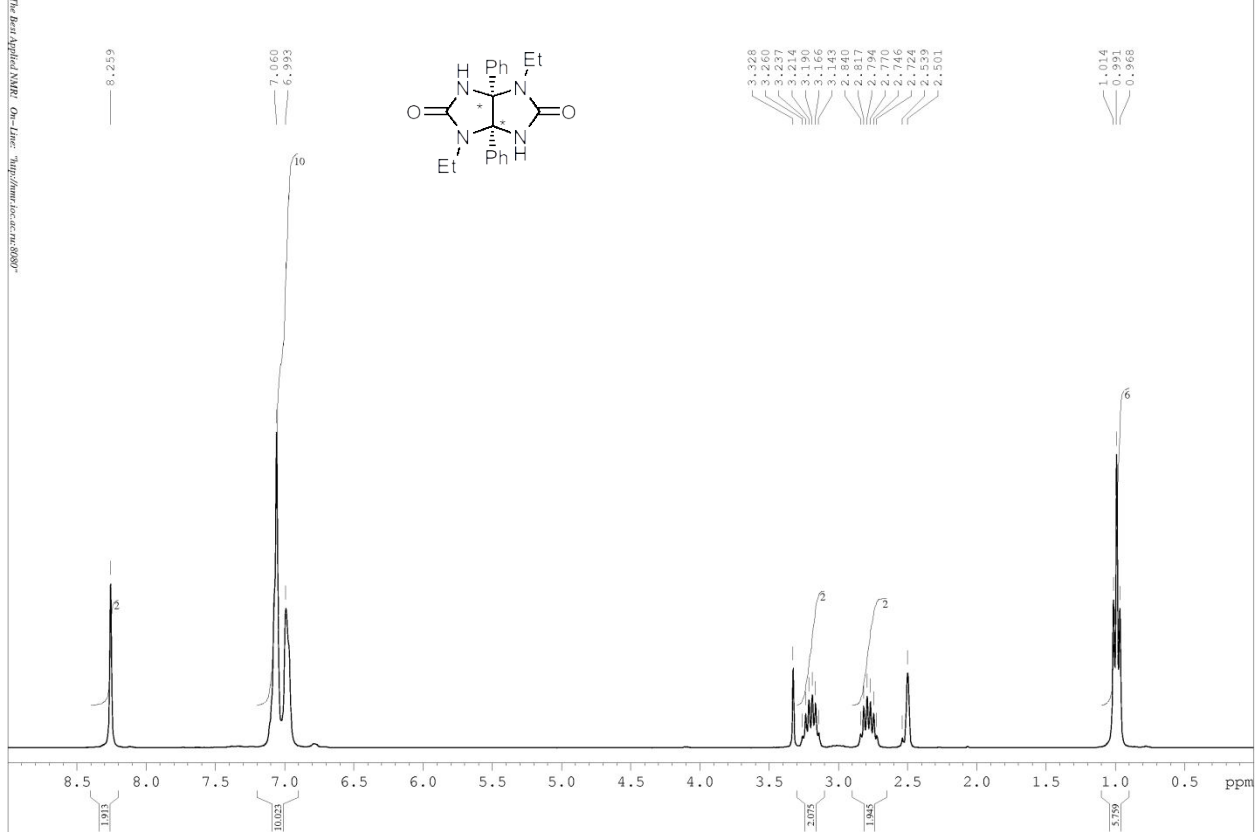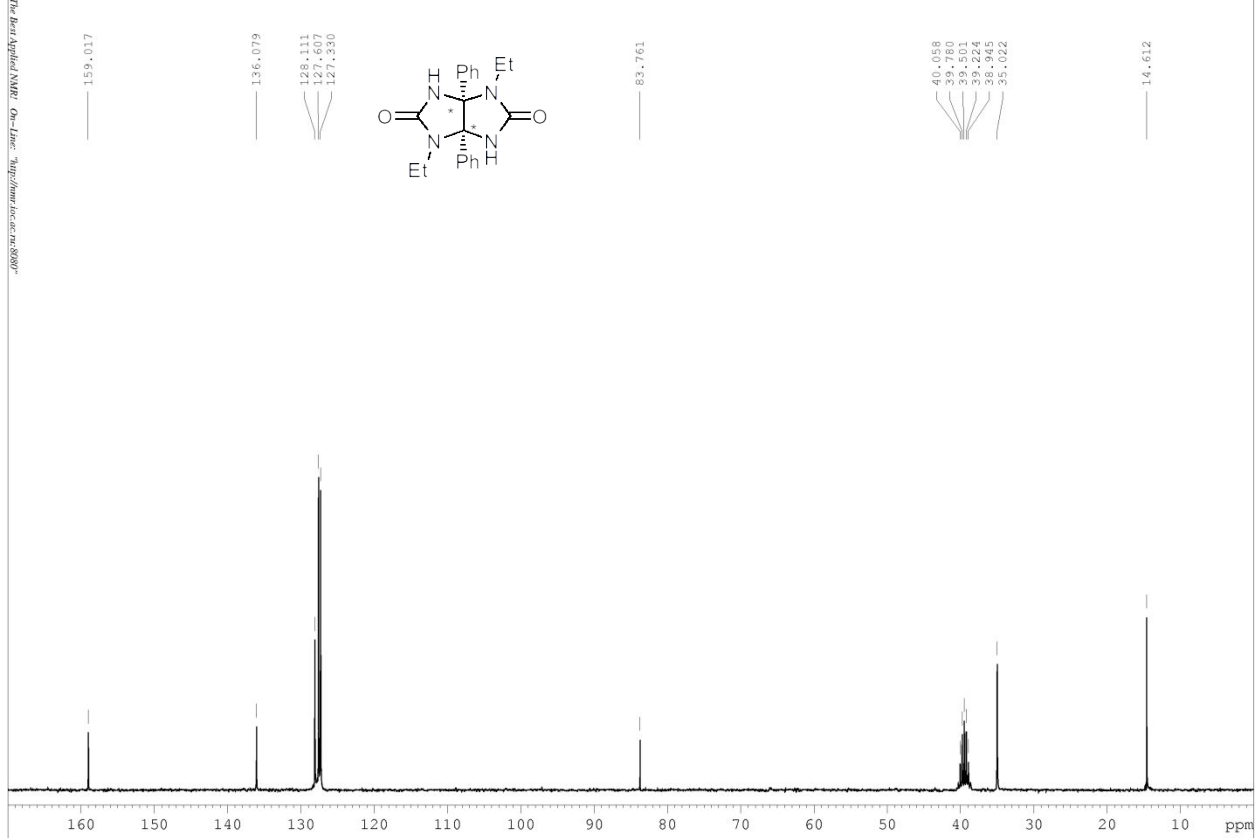

Supplement: d1ce00434d3.pdf [file d1ce00434d3.pdf]
